# Supplementary material for: Preparation of aluminum-containing mesoporous silica with hierarchical macroporous architecture and its enhanced catalytic activities
Source: Royal Society of Chemistry journal article supplement (doi:10.1039/c3cp51022k), 2013-01-01
Supplement: c3cp51022k.pdf [file c3cp51022k.pdf]

## Supplementary Information

### **Preparation of aluminum-containing mesoporous silica with hierarchical macroporous architecture and its enhanced catalytic activities**

Takashi Kamegawa,<sup>a</sup> Shota Tanaka,<sup>a</sup> Hiroki Seto,<sup>a</sup> Dayang Zhou,<sup>b</sup> and

Hiromi Yamashita\*<sup>ac</sup>

<sup>a</sup> *Division of Materials and Manufacturing Science, Graduate School of Engineering,*

*Osaka University, 2-1 Yamadaoka, Suita, Osaka 565-0871, Japan.*

<sup>b</sup> *The Institute of Scientific and Industrial Research (ISIR), Osaka University, 8-1 Mihogaoka,*

*Ibaraki-shi, Osaka 567-0047, Japan.*

<sup>c</sup> *Elements Strategy Initiative for Catalysts and Batteries (ESICB), Kyoto University, Katsura, Kyoto*

*615-8520, Japan.*

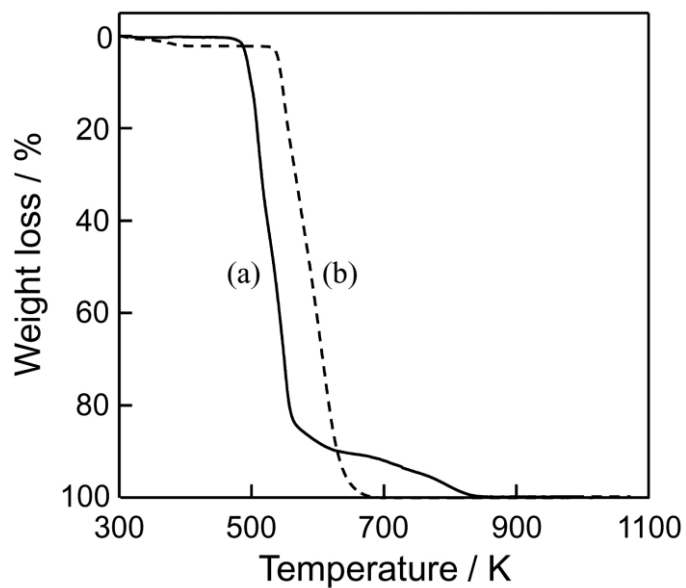

Fig. S1 TG data of (a) CTAC and (b) PMMA particles.

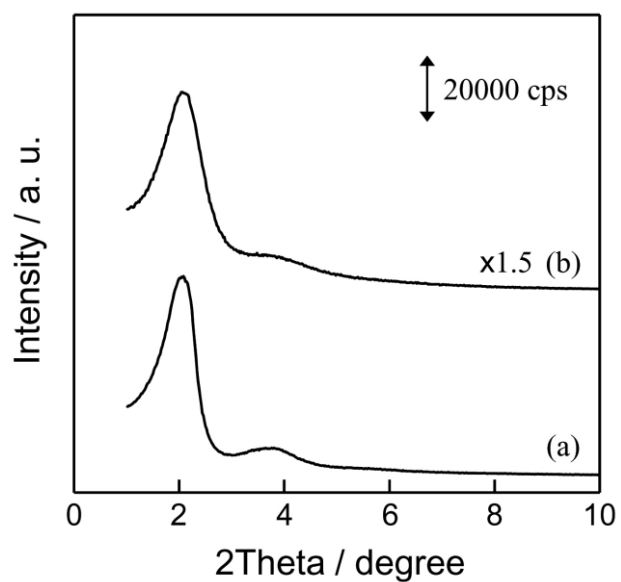

Fig. S2 XRD patterns of (a) Al-MS and (b) Al-MMS.

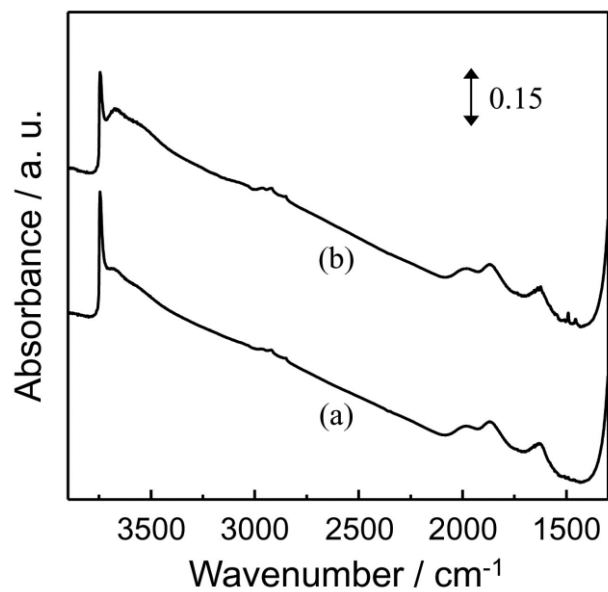

**Fig. S3** FT-IR spectra of Al-MMS before pyridine contact (a) and after adsorption of pyridine and subsequent evacuation at 473 K under vacuum (b).
